# Supplementary material for: Combined scRNAseq and Bulk RNAseq Analysis to Reveal the Dual Roles of Oxidative Stress-Related Genes in Acute Myeloid Leukemia
Source: Hindawi journal article supplement (doi:10.1155/2023/5343746), 2023-02-09

# OXIDATIVE\_PHOSPHORYLATION

| pvalue | p.adjust |
|--------|----------|
| 2e-04  | 0.0014   |

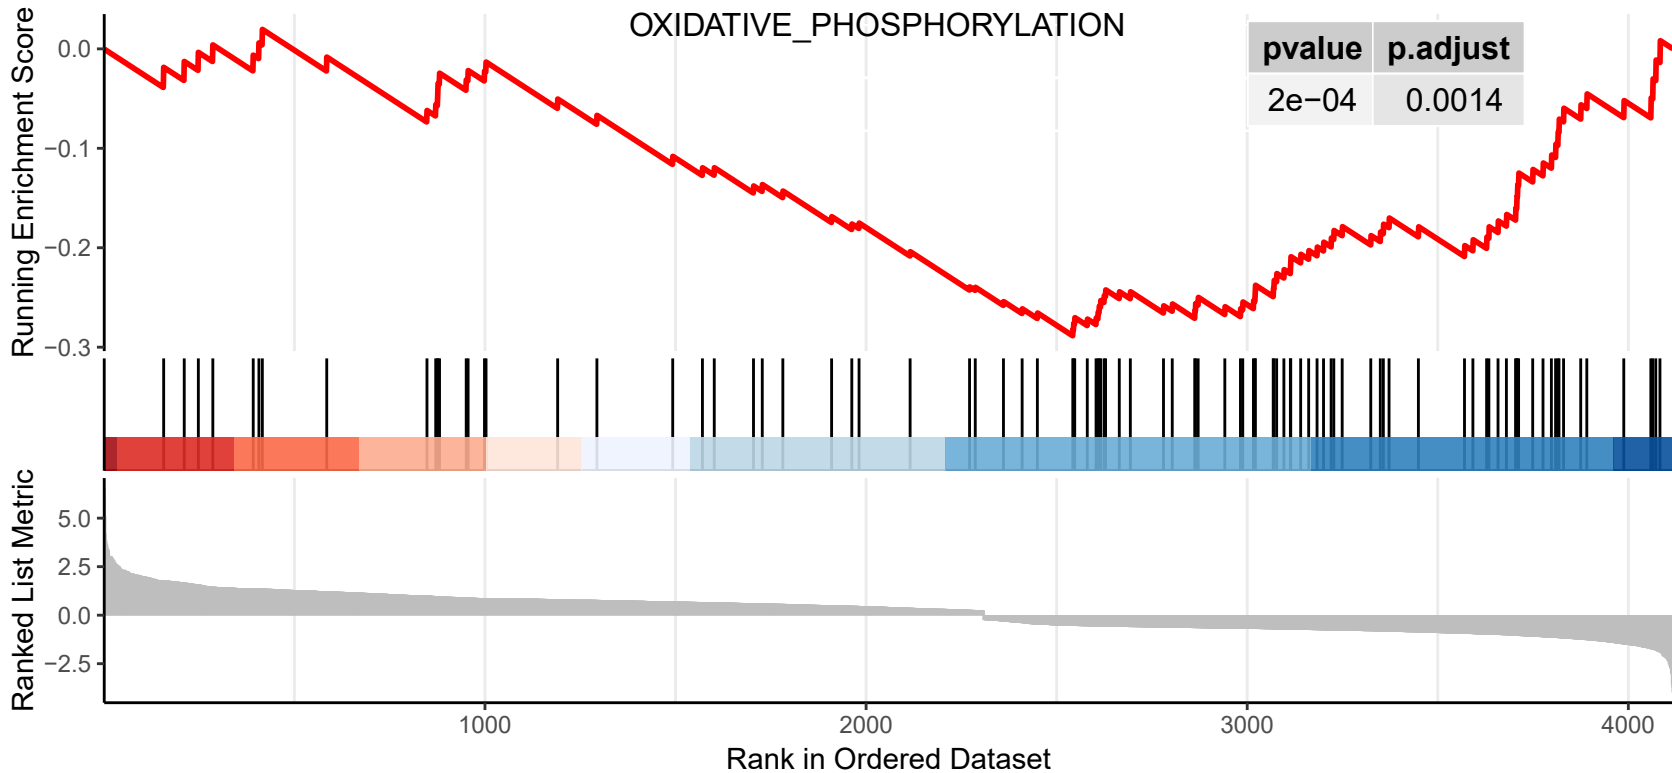

Supplement: f2 [file 5343746.f2.pdf]
