# Supplementary material for: Combined scRNAseq and Bulk RNAseq Analysis to Reveal the Dual Roles of Oxidative Stress-Related Genes in Acute Myeloid Leukemia
Source: Hindawi journal article supplement (doi:10.1155/2023/5343746), 2023-02-09
Supplement: f3 [file 5343746.f3.pdf]

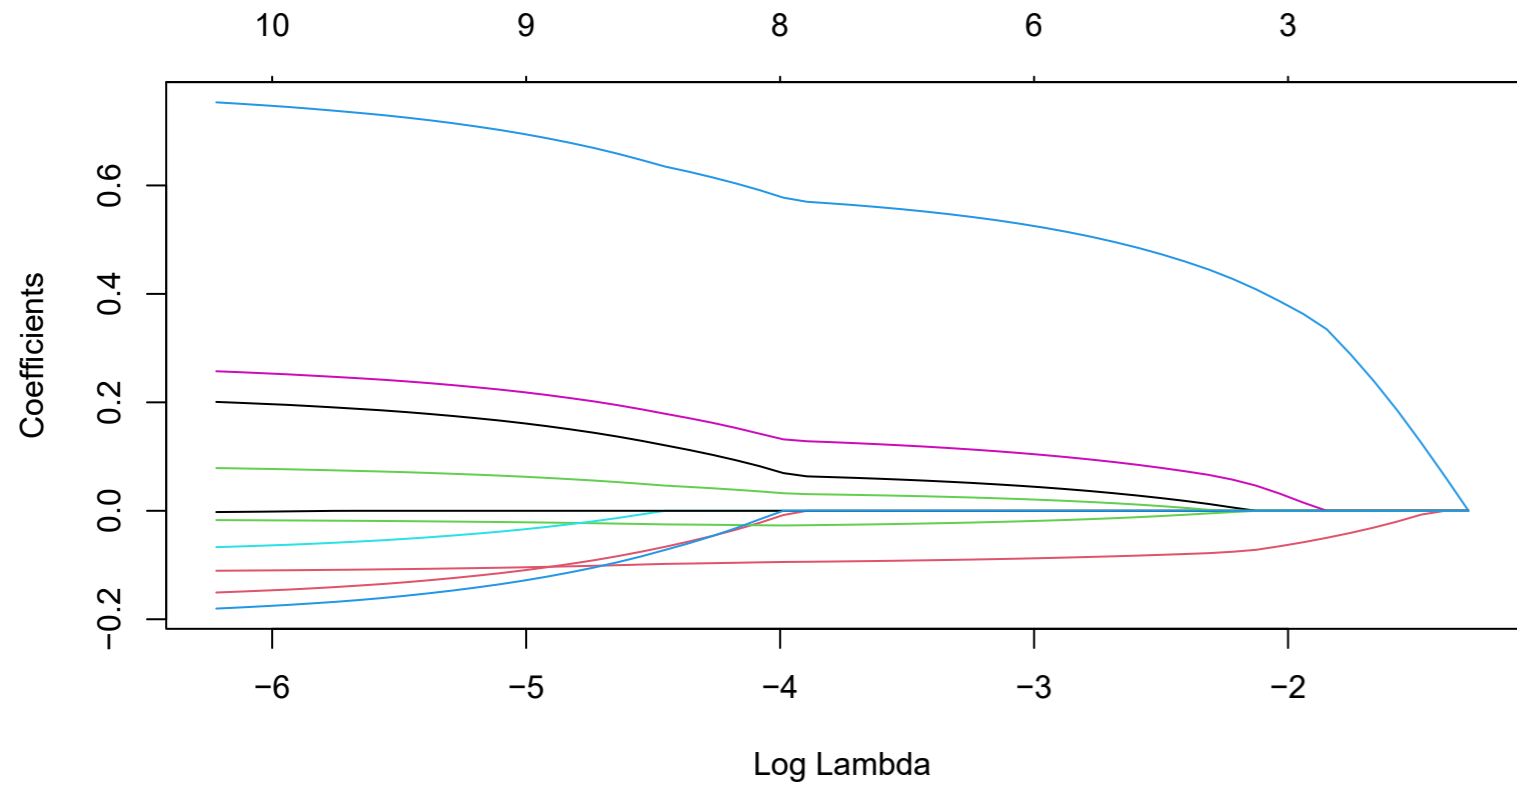

(A)

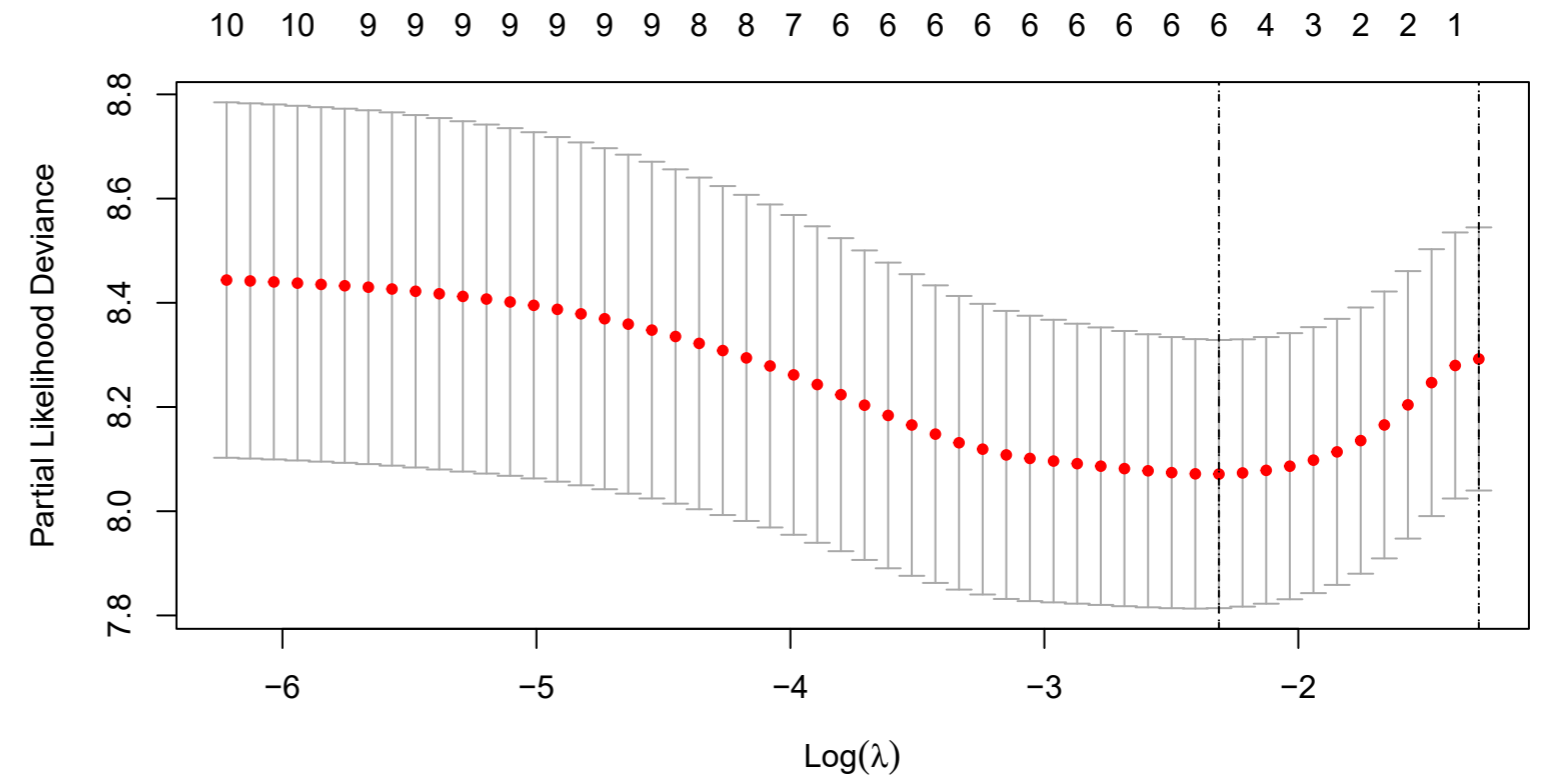

(B)
