# Supplementary material for: Combined scRNAseq and Bulk RNAseq Analysis to Reveal the Dual Roles of Oxidative Stress-Related Genes in Acute Myeloid Leukemia
Source: Hindawi journal article supplement (doi:10.1155/2023/5343746), 2023-02-09
Supplement: f4 [file 5343746.f4.pdf]

Sup table 1.AML oncogenesis-related OS genes

- 1 DHFR
- 2 AREG
- 3 PTPRC
- 4 MKI67
- 5 ATXN8OS
- 6 PSIP1
- 7 CR1
- 8 FTL
- 9 BCL6
- 10 UBC
- 11 SELL
- 12 CD34
- 13 CTSG
- 14 NEAT1
- 15 LGALS3
- 16 MT-ND6
- 17 FKBP5
- 18 MSRB3
- 19 THBS1
- 20 GRN
- 21 PPP1R15A
- 22 SGK1
- 23 AIF1
- 24 CALM2
- 25 MALAT1
- 26 AHSP
- 27 S100A9
- 28 VIM
- 29 TNFAIP3
- 30 ENO1
- 31 LAMP2
- 32 SERPINA1
- 33 CTSD
- 34 TFRC
- 35 EGR1
- 36 ETS1
- 37 ELANE
- 38 MT-ND5
- 39 DUSP1
- 40 MGST1
- 41 HSPD1
- 42 ATM
- 43 CDKN1A
- 44 HMGB1
- 45 CLU
- 46 HBB
- 47 CALM1
- 48 HIF1A
- 49 LMNA
- 50 DDIT3
- 51 GPX1
- 52 SQSTM1
- 53 HSPA5
- 54 GAPDH
- 55 JUN
- 56 CXCL8
- 57 MPO

58 CAT  
59 SOD1
