# Supplementary material for: Combined scRNAseq and Bulk RNAseq Analysis to Reveal the Dual Roles of Oxidative Stress-Related Genes in Acute Myeloid Leukemia
Source: Hindawi journal article supplement (doi:10.1155/2023/5343746), 2023-02-09
Supplement: f5 [file 5343746.f5.pdf]

Sup table 2. chemotherapy-related OS genes

- 1 GPX8
- 2 GADD45G
- 3 FMO4
- 4 ASPA
- 5 CCR7
- 6 FRZB
- 7 CACNA2D1
- 8 YAP1
- 9 ITGA2
- 10 ACO2
- 11 BLOC1S1
- 12 GSTM5
- 13 PDGFRB
- 14 FOXO4
- 15 LPL
- 16 CFH
- 17 PLG
- 18 THBS1
- 19 SGK1
- 20 RELA
- 21 TJP1
- 22 PDGFRL
- 23 ALDH1A1
- 24 EPAS1
- 25 CXCL12
- 26 IGF2R
- 27 ADH1C
- 28 PLA2G6
- 29 NR3C2
- 30 IL1R1
- 31 CD40
- 32 SGCB
- 33 ETS1
- 34 FN1
- 35 CYP1B1
- 36 PRKAA2
- 37 ANXA5
- 38 MMP2
- 39 VCAM1
- 40 APOE
- 41 CP
- 42 CCL2
- 43 APP
- 44 NOS1
